# Supplementary material for: Effectiveness of Exercise and Manual Therapy as Treatment for Patients with Migraine, Tension-Type Headache or Cervicogenic Headache: An Umbrella and Mapping Review with Meta-Meta-Analysis
Source: MDPI journal article supplement (doi:10.3390/app11156856), 2021-07-26
Supplement: s1 [file s1]

**Supplementary Material. Table S1** Citation matrix for the assessment of study overlap within systematic reviews.

[illegible]

|                                |  |  |  |  |   |   |   |   |   |   |   |   |   |   |  |  |   |   |   |
|--------------------------------|--|--|--|--|---|---|---|---|---|---|---|---|---|---|--|--|---|---|---|
| Ajimsha, 2011                  |  |  |  |  | X |   |   |   |   |   |   |   |   |   |  |  |   |   |   |
| Ghanbari, 2014                 |  |  |  |  | X |   |   |   |   |   |   |   |   |   |  |  |   |   |   |
| Ghanbari, 2015                 |  |  |  |  | X |   |   |   |   |   |   |   |   |   |  |  |   |   |   |
| Lawler, 2006                   |  |  |  |  | X |   |   |   |   |   |   |   |   |   |  |  |   |   |   |
| Andersen, 2011                 |  |  |  |  |   | X |   |   |   |   |   |   |   |   |  |  |   |   |   |
| Bodes-Pardo, 2013              |  |  |  |  |   | X |   |   |   |   |   |   |   |   |  |  |   |   |   |
| Carlsson, 1990                 |  |  |  |  |   | X |   |   |   |   |   |   |   |   |  |  | X |   |   |
| de Hertogh, 2009               |  |  |  |  |   | X | X |   |   |   |   |   |   |   |  |  | X |   |   |
| Demirturk, 2002                |  |  |  |  |   | X |   | X |   | X |   |   |   | X |  |  |   |   |   |
| Foster,2004                    |  |  |  |  |   | X | X |   |   |   |   |   |   |   |  |  |   |   |   |
| Ghanbari, 2012                 |  |  |  |  |   | X |   |   |   |   |   |   |   |   |  |  |   |   |   |
| Gunreben-Stempfle,2009         |  |  |  |  |   | X |   |   |   |   |   |   |   |   |  |  |   |   |   |
| Hall et al, 2007               |  |  |  |  |   | X |   |   | X |   |   |   |   |   |  |  |   |   |   |
| Jull et al. 2002               |  |  |  |  |   | X |   |   | X |   |   |   | X |   |  |  | X | X |   |
| Lemstra, 2002                  |  |  |  |  |   | X |   |   |   |   |   |   |   |   |  |  |   |   |   |
| Mongini, 2008                  |  |  |  |  |   | X |   |   |   |   |   |   |   |   |  |  |   |   |   |
| Mongini, 2012                  |  |  |  |  |   | X |   |   |   |   |   |   |   |   |  |  | X |   |   |
| Shin and Lee, 2014             |  |  |  |  |   | X |   |   |   |   |   |   |   |   |  |  |   |   |   |
| Sjögren, 2005                  |  |  |  |  |   | X |   |   |   |   |   |   |   |   |  |  |   |   |   |
| Söderberg, 2011                |  |  |  |  |   | X |   |   |   |   |   |   |   |   |  |  |   |   |   |
| Torelli, 2004                  |  |  |  |  |   | X |   | X |   |   |   |   |   |   |  |  | X |   |   |
| van Ettehoven and Lucas, 2006  |  |  |  |  |   | X |   | X |   |   |   |   |   | X |  |  | X |   |   |
| Varkey, 2009                   |  |  |  |  |   | X |   |   |   |   |   |   |   |   |  |  | X |   |   |
| von Piekartz and Luedtke, 2011 |  |  |  |  |   | X |   |   |   |   |   |   |   |   |  |  |   |   |   |
| Ylinen, 2010                   |  |  |  |  |   | X |   |   |   |   |   |   |   |   |  |  |   |   |   |
| Yousseff and Shanb, 2013       |  |  |  |  |   | X |   |   |   |   |   |   | X |   |  |  |   |   |   |
| Hsieh, 2010                    |  |  |  |  |   |   |   | X |   |   |   |   |   |   |  |  |   |   |   |
| Ghanbari, 2005                 |  |  |  |  |   |   |   | X |   |   |   |   |   |   |  |  |   |   |   |
| Toro-Velasco, 2009             |  |  |  |  |   |   |   |   | X |   |   |   |   |   |  |  |   |   |   |
| Jay, 1989                      |  |  |  |  |   |   |   |   | X |   |   |   |   |   |  |  |   |   |   |
| Borusiak, 2010                 |  |  |  |  |   |   |   |   |   | X |   |   |   |   |  |  |   |   |   |
| Haas, 2010                     |  |  |  |  |   |   |   |   |   | X |   |   | X |   |  |  |   |   | X |
| Nilsson, 1995                  |  |  |  |  |   |   |   |   |   | X |   | X | X |   |  |  |   |   | X |
| Nilsson, 1997                  |  |  |  |  |   |   |   |   |   | X |   | X | X |   |  |  | X | X | X |
| Bove, 1998                     |  |  |  |  |   |   |   |   |   | X | X |   |   |   |  |  | X |   |   |
| Donkin, 2002                   |  |  |  |  |   |   |   |   |   | X |   |   |   |   |  |  |   |   |   |
| Hanten, 1999                   |  |  |  |  |   |   |   |   |   | X |   |   | X |   |  |  |   |   |   |
| Boline, 1995                   |  |  |  |  |   |   |   |   |   | X | X | X |   |   |  |  | X |   |   |

[illegible]

The left column shows each of the primary studies (randomized controlled trials or controlled clinical trials) included in the reviews. The following columns show the systematic reviews included in the umbrella review, indicating with a dot the primary studies that included each of them.
